# Supplementary material for: Degradome sequencing reveals an integrative miRNA-mediated gene interaction network regulating rice seed vigor
Source: PubMed Central journal article supplement (PMC9158300; doi:10.1186/s12870-022-03645-2), 2022-06-01
Supplement: 12870_2022_3645_MOESM3_ESM.pdf [file 12870_2022_3645_MOESM3_ESM.pdf]

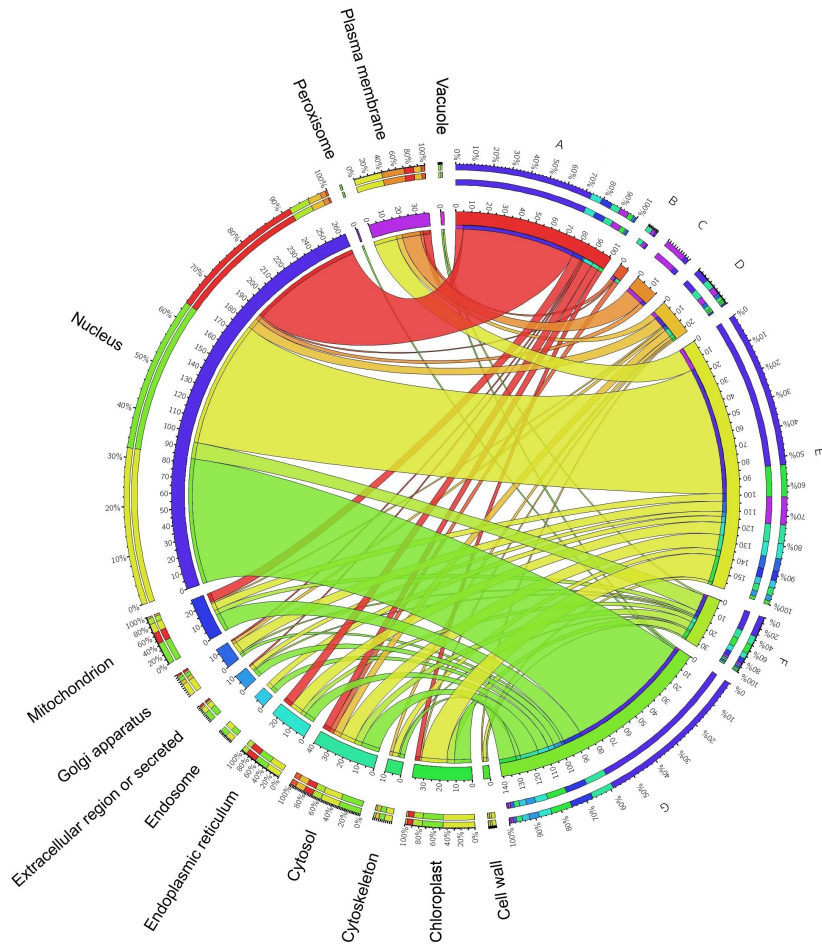

- A Degradome transcripts common to all unaged and aged seeds
- B Degradome transcripts common to all unaged seeds
- C Degradome transcripts common to all aged seeds
- D Degradome transcripts common to WT and *OE164c* unaged and aged seeds
- E Degradome transcripts unique to *OE164c* unaged and aged seeds
- F Degradome transcripts unique to *MIM164c* unaged and aged seeds
- G Other
