# Supplementary material for: Degradome sequencing reveals an integrative miRNA-mediated gene interaction network regulating rice seed vigor
Source: PubMed Central journal article supplement (PMC9158300; doi:10.1186/s12870-022-03645-2), 2022-06-01

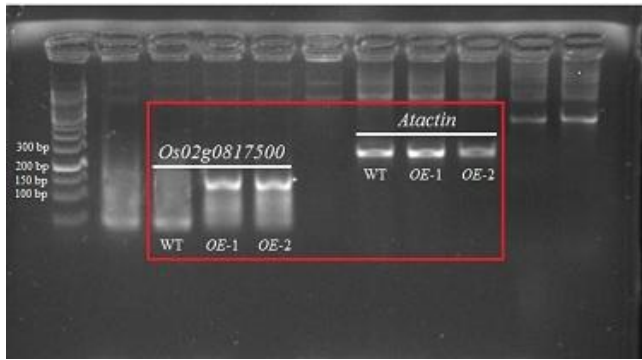

Supplement: 12870_2022_3645_MOESM5_ESM.pdf [file 12870_2022_3645_MOESM5_ESM.pdf]
